# Supplementary material
Source: HighWire-hosted journal article supplement (https://bmjpaedsopen.bmj.com/content/7/1/e001886)

**SUPPLEMENTARY FILE****Supplementary tables****Supplementary Table 1.** Details of obstetric complications among crying and non-crying but breathing neonates

| Frequency of complications                  | Crying (N=1155) | %    | Non crying but breathing (N=54) | %    |
|---------------------------------------------|-----------------|------|---------------------------------|------|
| Zero                                        | 1119            | 96.9 | 50                              | 92.6 |
| One                                         | 35              | 3.0  | 4                               | 7.4  |
| Two                                         | 1               | 0.1  | 0                               | 0.0  |
| <b>Maternal conditions</b>                  |                 |      |                                 |      |
| Hypothyroidism                              | 1               | 0.1  | 0                               | 0.0  |
| Diabetes Mellitus inc. gestational diabetes | 0               | 0.0  | 0                               | 0.0  |
| Oligohydramnios                             | 1               | 0.1  | 1                               | 1.9  |
| Polyhydramnios                              | 0               | 0.0  | 0                               | 0.0  |
| <b>Delivery complications</b>               |                 |      |                                 |      |
| Antepartum hemorrhage                       | 1               | 0.1  | 0                               | 0.0  |
| Pre-eclampsia                               | 1               | 0.1  | 0                               | 0.0  |
| Eclampsia                                   | 0               | 0.0  | 0                               | 0.0  |
| Intrapartum fever                           | 1               | 0.1  | 0                               | 0.0  |
| Chorioamnionitis                            | 1               | 0.1  | 0                               | 0.0  |
| Premature rupture of membranes              | 4               | 0.3  | 0                               | 0.0  |
| Prolonged labour                            | 12              | 1.0  | 2                               | 3.7  |
| Decreased fetal movements                   | 3               | 0.3  | 0                               | 0.0  |
| Breech or transverse lie                    | 4               | 0.3  | 0                               | 0.3  |
| Prolapsed cord                              | 1               | 0.1  | 0                               | 0.0  |
| Fetal distress                              | 3               | 0.3  | 1                               | 1.9  |
| Maternal distress                           | 1               | 0.1  | 0                               | 0.0  |
| <b>Fetal/neonatal conditions</b>            |                 |      |                                 |      |
| Fetal congenital anomaly                    | 4               | 0.3  | 0                               | 0.0  |
| Nuchal cord                                 | 0               | 0.0  | 0                               | 0.0  |
| Cephalopelvic disproportion                 | 0               | 0.0  | 0                               | 0.0  |

**Supplementary Table 2.** Comparison of median heart rate (bpm) between crying and non-crying but breathing neonates. P values of < 0.004 were considered significant ( $p=0.05/12$ ) using individual Mann-Whitney U-tests followed by *post hoc* Bonferroni correction for multiple comparisons.

| Time    | Crying             |      | Non-crying but breathing |    | p-value |
|---------|--------------------|------|--------------------------|----|---------|
|         | Median (quartiles) | N    | Median (quartiles)       | N  |         |
| 10 sec  | 157 (118, 174)     | 171  | 155 (104, 178)           | 5  | 0.929   |
| 30 sec  | 168 (146, 182)     | 988  | 164 (140, 173)           | 44 | 0.082   |
| 45 sec  | 167 (149, 182)     | 1099 | 165 (138, 182)           | 51 | 0.508   |
| 60 sec  | 168 (151, 182)     | 1106 | 162 (149, 185)           | 51 | 0.851   |
| 75 sec  | 169 (154, 182)     | 1044 | 168 (150, 187)           | 52 | 0.860   |
| 90 sec  | 169 (154, 183)     | 899  | 164 (156, 188)           | 50 | 0.559   |
| 105 sec | 169 (155, 184)     | 794  | 175 (164, 190)           | 46 | 0.037   |
| 120 sec | 169 (156, 183)     | 695  | 174 (161, 191)           | 45 | 0.086   |
| 135 sec | 169 (156, 183)     | 495  | 173 (153, 190)           | 30 | 0.637   |
| 150 sec | 170 (156, 182)     | 364  | 172 (149, 192)           | 24 | 0.655   |
| 165 sec | 169 (155, 182)     | 290  | 177 (156, 192)           | 18 | 0.224   |
| 180 sec | 169 (156, 182)     | 210  | 170 (161, 195)           | 15 | 0.163   |

**Supplementary Figure.** Comparison of the first minute of action in the Helping Babies Breathe 2<sup>nd</sup> edition (left) and Essential Newborn Care 1 (right) neonatal resuscitation flow-charts.

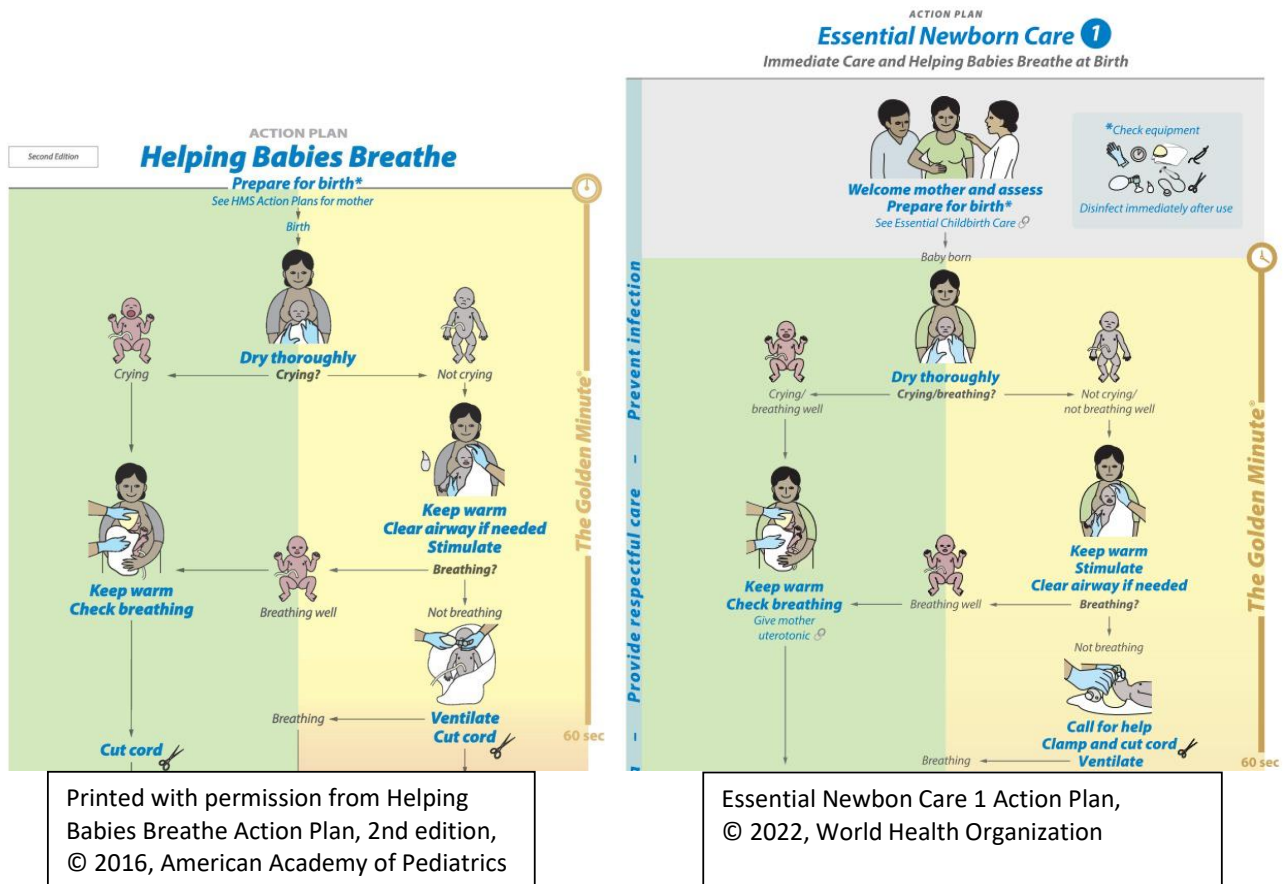

Supplement: inline-supplementary-material-1 [file inline-supplementary-material-1.pdf]
